1 **Protective Efficacy of Gastrointestinal SARS-CoV-2 Delivery Against Intranasal and**  
2 **Intratracheal SARS-CoV-2 Challenge in Rhesus Macaques**

3  
4 Jingyou Yu<sup>1\*</sup>, Natalie D. Collins<sup>2\*</sup>, Noe B. Mercado<sup>1</sup>, Katherine McMahan<sup>1</sup>, Abishek  
5 Chandrashekar<sup>1</sup>, Jinyan Liu<sup>1</sup>, Tochi Anioke<sup>1</sup>, Aiquan Chang<sup>1,3</sup>, Victoria M. Giffin<sup>1</sup>, David L.  
6 Hope<sup>1</sup>, Daniel Sellers<sup>1</sup>, Felix Nampanya<sup>1</sup>, Sarah Gardner<sup>1</sup>, Julia Barrett<sup>1</sup>, Huahua Wan<sup>1</sup>, Jason  
7 Velasco<sup>5</sup>, Elyse Teow<sup>5</sup>, Anthony Cook<sup>5</sup>, Alex Van Ry<sup>5</sup>, Laurent Pessaint<sup>5</sup>, Hanne Andersen<sup>5</sup>,  
8 Mark G. Lewis<sup>5</sup>, Christian Hofer<sup>7</sup>, Donald S. Burke<sup>6</sup>, Erica K. Barkei<sup>7</sup>, Hannah A.D. King<sup>8,9</sup>,  
9 Caroline Subra<sup>8,9</sup>, Diane Bolton<sup>8,9</sup>, Kayvon Modjarrad<sup>10</sup>, Nelson L. Michael<sup>11</sup>, Dan H.  
10 Barouch<sup>1,3,4\*\*</sup>

11  
12 \*Co-First Authors

13  
14 \*\*Correspondence: Dan H. Barouch ([dbarouch@bidmc.harvard.edu](mailto:dbarouch@bidmc.harvard.edu))

15  
16 <sup>1</sup>Center for Virology and Vaccine Research, Beth Israel Deaconess Medical Center, Harvard  
17 Medical School, Boston, MA 02215, USA; <sup>2</sup>Walter Reed National Military Medical Center,  
18 Bethesda, MD 20814, USA; <sup>3</sup>Harvard Medical School, Boston, Massachusetts, USA; <sup>4</sup>Ragon  
19 Institute of MGH, MIT, and Harvard, Cambridge, MA 02139, USA; <sup>5</sup>Bioqual, Rockville, MD  
20 20852, USA; <sup>6</sup>Graduate School of Public Health, University of Pittsburgh Medical Center,  
21 Pittsburgh, PA 15213 USA; <sup>7</sup>Veterinary Services Program, Center for Enabling Capabilities,  
22 Walter Reed Army Institute for Research, Silver Spring, MD 20910 USA; <sup>8</sup>Henry Jackson  
23 Foundation, Bethesda, Maryland 20910 USA; <sup>9</sup>Military HIV Research Program, Center for

24 Infectious Disease Research, Walter Reed Army Institute for Research, Silver Spring, MD 20910,  
25 USA; <sup>10</sup> Emerging Infectious Diseases Branch, Center for Infectious Disease Research, Walter  
26 Reed Army Institute for Research, Silver Spring, MD 20910 USA; <sup>11</sup>Center for Infectious  
27 Disease Research, Walter Reed Army Institute for Research, Silver Spring, MD 20910 USA

28

## Abstract

29

30 Live oral vaccines have been explored for their protective efficacy against respiratory  
31 viruses, particularly for adenovirus serotypes 4 and 7. The potential of a live oral vaccine against  
32 severe acute respiratory syndrome coronavirus 2 (SARS-CoV-2), however, remains unclear. In  
33 this study, we assessed the immunogenicity of live SARS-CoV-2 delivered to the gastrointestinal  
34 tract in rhesus macaques and its protective efficacy against intranasal and intratracheal SARS-  
35 CoV-2 challenge. Post-pyloric administration of SARS-CoV-2 by esophagogastroduodenoscopy  
36 resulted in limited virus replication in the gastrointestinal tract and minimal to no induction of  
37 mucosal antibody titers in rectal swabs, nasal swabs, and bronchoalveolar lavage. Low levels of  
38 serum neutralizing antibodies were induced and correlated with modestly diminished viral loads  
39 in nasal swabs and bronchoalveolar lavage following intranasal and intratracheal SARS-CoV-2  
40 challenge. Overall, our data show that post-pyloric inoculation of live SARS-CoV-2 is weakly  
41 immunogenic and confers partial protection against respiratory SARS-CoV-2 challenge in rhesus  
42 macaques.

43

44

## Importance

45

46 SARS-CoV-2 remains a global threat, despite the rapid deployment but limited coverage  
47 of multiple vaccines. Alternative vaccine strategies that have favorable manufacturing timelines,  
48 greater ease of distribution and improved coverage may offer significant public health benefits,  
49 especially in resource-limited settings. Live oral vaccines have the potential to address some of  
50 these limitations; however no studies have yet been conducted to assess the immunogenicity and

51 protective efficacy of a live oral vaccine against SARS-CoV-2. Here we report that oral  
52 administration of live SARS-CoV-2 in non-human primates may offer prophylactic benefits, but  
53 that formulation and route of administration will require further optimization.

54

55 **Keywords**

56

57 COVID-19, SARS-CoV-2, Live oral vaccine, immunogenicity, protective efficacy

58

## 59 **Introduction**

60

61           Coronavirus disease 2019 (COVID-19) has claimed millions of lives since its emergence  
62 in late 2019. Rapid and broad deployment of safe, effective and affordable vaccines will be the  
63 key to end the pandemic (1, 2). Multiple SARS-CoV-2 vaccines—including two mRNA vaccines  
64 and two adenoviral vectored vaccines—have advanced to emergency authorization or full  
65 approval at an unprecedented pace. Yet the wide gap in global availability of vaccines and the  
66 emergence of virus variants necessitate additional vaccine approaches (1).

67           Live oral vaccines have long been explored for their utility to curb infectious diseases.  
68 Immunologically, the gastrointestinal (GI) tract is one of the largest lymphoid organs in the body,  
69 comprised of organized lymphoid tissue and large populations of scattered innate and adaptive  
70 effector cells, including IgA-secreting plasma cells, CD4<sup>+</sup> and CD8<sup>+</sup> T cells, regulatory T cells,  
71 and  $\gamma\delta$  T cells (3, 4). Orally administered live vaccines may therefore elicit different immune  
72 responses than non-replicating gene-based vaccines, and the GI delivery route may be a means of  
73 attenuation (5). Direct administration of antigens at mucosal surfaces is an efficient approach to  
74 inducing a potent mucosal immune response (6). Logistically, live oral vaccines allow for  
75 simplified development, rapid production and distribution and ease of administration (7). Live  
76 virus production can be scaled up in cell culture systems without the need for complex  
77 inactivation and purification steps. Vaccination procedures are free of needles and there is often  
78 no need for specially trained medical personnel (8). Moreover, live oral vaccines are typically  
79 cost-effective. The replicating feature of live viruses can allow for administration of a lower dose  
80 to achieve immunity. As such, oral vaccines may be preferable in resource-limited settings.

81 To date, several human oral vaccines have been licensed that contain live viruses. The US  
82 Department of Defense (DoD) and National Institutes of Health (NIH) developed co-  
83 administered live oral vaccines against adenovirus serotypes 4 and 7 (Ad4 and Ad7) in the 1970s  
84 (9, 10) and again in 2011 when the vaccine was re-formulated (11-13). These two vaccines  
85 contain wild-type virus with an enteric coating to protect against degradation from the low pH of  
86 gastric acid as they pass through to the lower GI tract (12, 14, 15). GI administration of Ad4 and  
87 Ad7 attenuates the viruses and induces serum-neutralizing antibodies that protect against  
88 subsequent type-specific respiratory infection (12, 14, 15). Both vaccines have been shown to be  
89 safe, do not disseminate systemically—evident by absence of vaccine virus in blood or urine—  
90 and provide more than 90% efficacy over the course of 8 to 10 weeks (11, 12, 14, 15). Recent  
91 data have revealed that the Ad4/Ad7 live oral vaccine elicited immune responses are durable for  
92 at least 6 years (16). Oral vaccines have also been developed for GI viruses, such as rotavirus  
93 and poliovirus, which have been in use for decades in children and have consistently  
94 demonstrated high safety, immunogenicity, and efficacy profiles (17-20).

95 Given the success of the live oral Ad4 and Ad7 vaccines and the demonstration of the  
96 presence of the angiotensin-converting enzyme 2 (ACE2) receptor, the primary receptor for  
97 SARS-CoV-2, throughout the GI tract mucosa (21), we performed a proof-of-concept study to  
98 assess the immunogenicity and protective efficacy of GI delivery of live SARS-CoV-2 in rhesus  
99 macaques. Delivery of  $1 \times 10^6$  50% tissue culture infectious dose (TCID<sub>50</sub>) virus to the duodenum  
100 by endoscopy caused a transient infection with localized replication in the GI tract and was  
101 associated with modest immunogenicity and partial protection against intranasal and  
102 intratracheal SARS-CoV-2 challenge.

103

## 104 **Results**

105

### 106 **Limited SARS-CoV-2 Replication in the Gastrointestinal Tract**

107 To determine the immunogenicity and protective efficacy of the GI delivery of SARS-  
108 CoV-2, we inoculated 21 rhesus macaques with  $1 \times 10^6$  50% tissue culture infectious dose  
109 (TCID<sub>50</sub>) SARS-CoV-2 from the WA1/2020 strain (NR-52281; BEI Resources) (N=9) or PBS  
110 sham controls (N=12) by esophagogastroduodenoscopy (EGD). The virus inoculum was 2 ml of  
111 live virus in PBS and was delivered to the proximal duodenum on day 0.

112 Viral shedding was quantified on study days 1, 2, 4, 7, 14, 21 and 28 by genomic (gRNA)  
113 or envelope (E) subgenomic (sgRNA) RT-PCR assays (22). Viral shedding in the stool was  
114 observed in 7 out of 9 vaccinated macaques by gRNA assays on day 1 post-inoculation, but only  
115 one macaque had sustained viral shedding in stool for more than 21 days (Fig. 1A). Additionally,  
116 virus was observed by gRNA assays from rectal swabs (RS) in 4 out of 9 macaques, with  
117 detectable virus in two macaques at 21 days post-immunization (Fig. 1B). In contrast, virus was  
118 not detected in sham control macaques (Fig. 1A and 1B). Similar but limited viral shedding was  
119 observed by sgRNA assays in the vaccinated animals but not the sham controls (Fig. 1C and 1D).  
120 However, we did not observe virus in serum, saliva, bronchoalveolar lavage (BAL) or nasal  
121 swabs (NS) (data not shown). On day 1, vaccinated animals had a median 3.49 log<sub>10</sub> viral copies  
122 per gram stool, whereas the sham animals had no detectable virus (P<0.00001, two-sided Mann-  
123 Whitney tests) (Fig. 1E). These data suggest that the virus inoculum was rapidly excreted with  
124 limited virus replication in the GI tract.

125

### 126 **Immunogenicity of GI Delivery of SARS-CoV-2 Live Vaccine in Rhesus Macaques**

127 Four weeks after vaccination, we observed low serum pseudovirus neutralizing antibody  
128 (NAb) titers in 7 of 9 vaccinated macaques (Fig. 2), whereas the sham animals had undetectable  
129 NAb titers. NAb titers in mucosal specimens, including NS, BAL, RS, and stool, were below the  
130 limit of detection (data not shown). We assessed T cell responses in peripheral blood  
131 mononuclear cells (PBMCs) at week 4 post-inoculation and found undetectable responses to  
132 pooled S peptides in both vaccinated and unvaccinated animals by IFN- $\gamma$  ELISPOT assays and  
133 intracellular cytokine staining (ICS) assays (data not shown). Together, these data suggest that  
134 the GI delivery of SARS-CoV-2 generated modest levels of serum neutralizing antibodies but  
135 undetectable mucosal immune responses and cellular immune responses.

136

### 137 **Protective Efficacy Against SARS-CoV-2 Challenge**

138 At week 4 post-inoculation, all animals were challenged with  $10^5$  TCID<sub>50</sub> of SARS-  
139 CoV-2 WA1/2020, administered in a 2 ml volume by the intranasal (IN) and intratracheal (IT)  
140 routes. Following challenge, we assessed viral loads in the BAL and NS (22, 23). High levels of  
141 sgRNA were observed in the sham controls with a median peak of 4.79 (range 2.61-5.69) log<sub>10</sub>  
142 sgRNA copies/ml in BAL and a median peak of 6.21 (range 3.30-6.82) log<sub>10</sub> sgRNA  
143 copies/swab in NS (Fig. 3A and 3B). Lower viral loads were observed in the vaccinated  
144 macaques (Fig. 3A and 3B), with 1.61 and 1.59 log<sub>10</sub> reductions of median peak sgRNA in BAL  
145 and NS, respectively (P=0.0040 and P=0.0093, two-sided Mann-Whitney tests) (Fig. 3C). These  
146 data demonstrate that the GI delivered SARS-CoV-2 provided partial but modest protection  
147 against respiratory SARS-CoV-2 challenge.

148 On day 14 following challenge, histopathology revealed minimal to mild interstitial  
149 pneumonia in all animal groups, characterized by type II pneumocyte hyperplasia, perivascular



150 inflammation and/or vasculitis of small to medium-sized vessels, and thickening of alveolar  
151 septae by fibrin and/or mononuclear inflammatory cells (Fig. 4). No clear difference in  
152 pulmonary pathology was noted between the vaccinated animals and sham controls.

153

### 154 **Immune Correlates of Protection**

155         Given the observed protection, we assessed immune correlates of protection. As shown in  
156 Fig. 5A, the log<sub>10</sub> pseudovirus NAb titer at week 4 inversely correlated with peak log<sub>10</sub> sgRNA  
157 copies/ml in both BAL (R=-0.6165, P=0.0029) and NS (R=-0.3693, P=0.0994) (Fig. 5A). The  
158 less robust correlation with viral loads in NS compared with viral loads in BAL is consistent with  
159 prior studies (24, 25). As shown in Fig. 5B, peak viral shedding in stool did not correlate with  
160 peak log<sub>10</sub> sgRNA copies/ml in BAL and NS.

161

### 162 **Discussion**

163

164         In this study, we demonstrate that GI delivery of live 1x10<sup>6</sup> TCID<sub>50</sub> SARS-CoV-2  
165 elicited modest immune responses and provided partial protection against intranasal and  
166 intratracheal challenge with SARS-CoV-2. Moreover, serum neutralizing antibody titers  
167 correlated with protective efficacy. These data provide proof-of-concept that an orally  
168 administered vaccine can protect against respiratory SARS-CoV-2 challenge, but the limited  
169 immunogenicity and protective efficacy observed here suggests that the oral vaccine approach  
170 will require optimization.

171         SARS-CoV-2 has been shown to productively infect human and macaque GI tract (26-  
172 28), specifically enterocytes (29-31), and infection is frequently associated with clinical

173 symptoms in humans (32). We thus hypothesized that the replication of the live viral vaccine in  
174 the gut may lead to induction of systemic and mucosal immunity. We observed rapid excretion  
175 of the virus with minimal replication in the GI tract, which may explain the poor immunogenicity  
176 and limited protection. In contrast, Jiao et al. recently reported that intragastric inoculation of  $1 \times$   
177  $10^7$  PFU SARS-CoV-2 in rhesus macaques resulted in a productive and sustained viral infection  
178 in GI tract (28). This could reflect different inoculum doses, administration techniques, or animal  
179 cohorts.

180 Data on expression of ACE2 receptor in the stomach and GI tract is limited. Available  
181 data suggest abundant expression in the small intestines (21). Taken together with minimal  
182 replication of SARS-CoV2 in the GI tract, but clear correlation of serum NAb with protection in  
183 the BAL and NS, it is likely that the limited immune responses were due to an inadequate  
184 antigenic load in the GI tract. Therefore, optimization of the oral vaccine formulation, including  
185 the use of encapsulation and buffers for improved controlled delivery of SARS-CoV-2 to the GI  
186 tract, with adequate time for viral replication in a hospitable micro-environment, may allow more  
187 effective delivery of an oral vaccine. Higher doses or repetitive doses may also prove useful.

188 In summary, our data show that a single post-pyloric administration of live SARS-CoV-2  
189 by EGD elicited detectable serum NAb titers and partially protected against respiratory SARS-  
190 CoV-2 challenge in rhesus macaques. Optimization of the current strategy, with encapsulation  
191 and extended delivery systems, as well as improvements in dosage and schedule will be required  
192 for a live, oral, SARS-CoV2 vaccine.

193

194

195 **Acknowledgements**

196

197 We thank Robert Kushner, Daniel Sellers, Owen Sanborn, Kunza Ahmad, for generous  
198 advice, assistance, and reagents. This project was funded by the Henry Jackson Foundation  
199 (2018-CHEDA-001-948100), the Musk Foundation, and the Ragon Institute of MGH, MIT, and  
200 Harvard.

201

202 **Author Contributions**

203

204 D.H.B., J.Y., N.D.C. K.M., N.L.M., D.L.B. designed the study and reviewed all data.  
205 J.Y., N.B.M., K.M., J.L., A.C., J.L., A.C., D.L.H., V.M.G., F.N., S.P., H.W, C.S., H.A.D.K.  
206 performed the immunologic and virologic assays. E.K.B performed histological studies. J.V.,  
207 E.T., A.C., A.V.R., L.P., H.A., and M.G.L. led the clinical care of the animals. J.Y., N.D.C., and  
208 D.H.B. wrote the paper with all co-authors.

209

210

211 **Figure Legends**

212

213 **Figure 1. Viral shedding in rhesus macaques following live vaccine EGD administration.**

214 Rhesus macaques were administered  $10^6$  TCID<sub>50</sub> SARS-CoV-2GI via EGD. (A) Log<sub>10</sub> gRNA  
215 copies/g stool (limit 200 copies/ml) or (C) Log<sub>10</sub> sgRNA copies/g stool were assessed in stools  
216 in sham controls and in vaccinated animals following challenge. (B) Log<sub>10</sub> gRNA copies/swab  
217 or (D) Log<sub>10</sub> sgRNA copies/swab (limit 50 copies/swab) were assessed in rectal swabs (RS) in  
218 sham controls and in vaccinated animals following challenge. Red lines reflect median values. (E)  
219 Peak viral loads in stool on day 1 following vaccination. Red lines reflect median viral loads. P-  
220 values indicate two-sided Mann-Whitney tests.

221

222 **Figure 2. Humoral immune responses in vaccinated rhesus macaques.** Humoral immune

223 responses were assessed at weeks 0 and 4 by pseudovirus neutralization assays. Red bars reflect  
224 median responses. Dotted lines reflect assay limit of detection.

225

226 **Figure 3. Viral loads in rhesus macaques following SARS-CoV-2 challenge.** Rhesus

227 macaques were challenged by the intranasal and intratracheal route with  $10^5$  TCID<sub>50</sub> SARS-  
228 CoV-2. (A) Log<sub>10</sub> sgRNA copies/ml (limit 50 copies/ml) were assessed in bronchoalveolar  
229 lavage (BAL) in sham controls and in vaccinated animals following challenge. (B) Log<sub>10</sub>  
230 sgRNA copies/swab (limit 50 copies/swab) were assessed in nasal swabs (NS) in sham controls  
231 and in vaccinated animals following challenge. Red lines reflect median values. (C) Peak viral  
232 loads in BAL and NS following challenge. Peak viral loads occurred on day 2 following  
233 challenge. Red lines reflect median viral loads. P-values indicate two-sided Mann-Whitney tests.

234

235 **Figure 4. Histopathologic examination following SARS-CoV-2 challenge.** Lung tissues were  
236 collected at necropsy on day 14 post-challenge, fixed with neutral buffered formalin, and stained  
237 with hematoxylin and eosin (H&E) for standard microscopic examination. Representative lung  
238 tissue sections from the PBS control (A), high-dose ( $10^6$  TCID<sub>50</sub>) vaccinated (B) low-dose ( $10^4$   
239 TCID<sub>50</sub>) vaccinated (C) SARS-CoV-2 challenged rhesus macaques. Minimal to mild interstitial  
240 pneumonia is characterized by inflammatory cellular infiltrates and type II pneumocyte  
241 hyperplasia. Scale bars: 100  $\mu$ m.

242

243 **Figure 5. Immune correlates of protection.** (A) Correlations of pseudovirus NAb titers at  
244 week 4 with log peak sgRNA copies/ml in BAL and NS following challenge. (B) Correlations of  
245 log peak sgRNA copies/ml in BAL and NS with log peak gRNA copies/g stool. Red lines reflect  
246 the best-fit relationship between these variables. P and R values reflect two-sided Spearman  
247 rank-correlation tests.

248

249

## 250 **Material and Methods**

251

252 **Animals, virus stocks, and study design.** 21 outbred Indian-origin adult male and  
253 female rhesus macaques (*Macaca mulatta*) ages 6-14 years old were randomly allocated to  
254 groups. All animals were housed at Bioqual, Inc. (Rockville, MD). Animals were EGD  
255 administered into duodenum with  $1 \times 10^6$  TCID<sub>50</sub> SARS-CoV-2 and then challenged with  $10^5$   
256 TCID<sub>50</sub> of WA1/2020 on day 28. The WA1/2020 (USA-WA1/2020; BEI Resources; NR-5228)  
257 challenge stock was grown in VeroE6 cells and deep sequenced as described previously (33).  
258 Deep sequencing of these stocks revealed no mutations in the Spike protein greater than >2.5%  
259 frequency. At the time of challenge, virus was administered as 1 ml by the intranasal (IN) route  
260 (0.5 ml in each nare) and 1 ml by the intratracheal (IT) route. All immunologic and virologic  
261 studies were performed blinded. Animal studies were conducted in compliance with all relevant  
262 local, state, and federal regulations and were approved by the Bioqual Institutional Animal Care  
263 and Use Committee (IACUC).

264 **EGD administration.** The scope was slowly and trans-orally inserted, under direct  
265 vision. Once the endoscope was in the stomach, insufflation, aspiration, and suctioning were  
266 used to aid in finding the specified gastro-intestinal region (pyloric region, the duodenum, or the  
267 jejunum). Once the duodenum was identified, inoculum was administered through the instrument  
268 channel inlet. The channel was then flushed with 1-2 mL of sterile water. The endoscope was  
269 removed and cleaned in between animals with appropriate disinfectant. A new endoscope was  
270 used on another animal while the previous endoscope was disinfected.

271 **Pseudovirus-based virus neutralization assay.** The SARS-CoV-2 pseudoviruses  
272 expressing a luciferase reporter gene were generated essentially as described previously (24, 25,

273 33, 34). Briefly, the packaging plasmid psPAX2 (AIDS Resource and Reagent Program),  
274 luciferase reporter plasmid pLenti-CMV Puro-Luc (Addgene), and spike protein expressing  
275 pcDNA3.1-SARS CoV-2  $\Delta$ CT of variants were co-transfected into HEK293T cells by  
276 lipofectamine 2000 (ThermoFisher). Pseudoviruses of SARS-CoV-2 variants were generated by  
277 using Wuhan/WIV04/2019strain (GISAID accession ID: EPI\_ISL\_402124). The supernatants  
278 containing the pseudotype viruses were collected 48 h post-transfection, which were purified by  
279 centrifugation and filtration with 0.45  $\mu$ m filter. To determine the neutralization activity of the  
280 plasma or serum samples from participants, HEK293T-hACE2 cells were seeded in 96-well  
281 tissue culture plates at a density of  $1.75 \times 10^4$  cells/well overnight. Three-fold serial dilutions of  
282 heat inactivated serum or nasal swab, BAL, rectal swab or stools were prepared and mixed with  
283 50  $\mu$ L of pseudovirus. The mixture was incubated at 37°C for 1 h before adding to HEK293T-  
284 hACE2 cells. 48 h after infection, cells were lysed in Steady-Glo Luciferase Assay (Promega)  
285 according to the manufacturer's instructions. SARS-CoV-2 neutralization titers were defined as  
286 the sample dilution at which a 50% reduction in relative light unit (RLU) was observed relative  
287 to the average of the virus control wells.

288 **ELISA.** WA1/2020 RBD-specific binding antibodies were assessed by ELISA  
289 essentially as described previously (24, 25, 33). Briefly, 96-well plates were coated with 1 $\mu$ g/ml  
290 RBD protein (source: Aaron Schmidt) in 1X DPBS and incubated at 4°C overnight. After  
291 incubation, plates were washed once with wash buffer (0.05% Tween 20 in 1 X DPBS) and  
292 blocked with 350  $\mu$ L Casein block/well for 2-3 h at room temperature. After incubation, block  
293 solution was discarded, and plates were blotted dry. Serial dilutions of heat-inactivated serum  
294 diluted in casein block were added to wells and plates were incubated for 1 h at room  
295 temperature, prior to three further washes and a 1 h incubation with a 1 $\mu$ g/ml dilution of anti-

296 macaque IgG HRP (Nonhuman Primate Reagent Resource) or a 1:1000 dilution of anti-monkey  
297 IgA HRP (Novus) at room temperature in the dark. Plates were then washed three times, and 100  
298  $\mu$ L of SeraCare KPL TMB SureBlue Start solution was added to each well; plate development  
299 was halted by the addition of 100  $\mu$ L SeraCare KPL TMB Stop solution per well. The  
300 absorbance at 450nm was recorded using a VersaMax microplate reader. For each sample,  
301 ELISA endpoint titer was calculated in Graphpad Prism software, using a four-parameter logistic  
302 curve fit to calculate the reciprocal serum dilution that yields an absorbance value of 0.2 at  
303 450nm. Log<sub>10</sub> endpoint titers are reported.

304 **IFN- $\gamma$  enzyme-linked immunospot (ELISPOT) assay.** ELISPOT assays were  
305 performed essentially as described previously (24, 25, 33). ELISPOT plates were coated with  
306 mouse anti-human IFN- $\gamma$  monoclonal antibody from BD Pharmigen at 5  $\mu$ g/well and incubated  
307 overnight at 4°C. Plates were washed with DPBS wash buffer (DPBS with 0.25% Tween20), and  
308 blocked with R10 media (RPMI with 10% heat inactivated FBS with 1% of 100x penicillin-  
309 streptomycin) for 1-4 h at 37°C. SARS-CoV-2 peptides pools from JPT were prepared & plated  
310 at a concentration of 1  $\mu$ g/well, and 200,000 cells/well were added to the plate. The peptides and  
311 cells were incubated for 18-24 h at 37°C. All steps following this incubation were performed at  
312 room temperature. The plates were washed with ELISPOT wash buffer (11% 10x DPBS and 0.3%  
313 Tween20 in 1L MilliQ water) and incubated for 2 h with Rabbit polyclonal anti-human IFN- $\gamma$   
314 Biotin from U-Cytech (1  $\mu$ g/mL). The plates were washed a second time and incubated for 2 h  
315 with Streptavidin-alkaline phosphatase from Southern Biotech (2  $\mu$ g/mL). The final wash was  
316 followed by the addition of Nitro-blue Tetrazolium Chloride/5-bromo-4-chloro 3  
317 'indolylphosphate p-toluidine salt (NBT/BCIP chromagen) substrate solution for 7 min. The



318 chromagen was discarded and the plates were washed with water and dried in a dim place for 24  
319 h. Plates were scanned and counted on a Cellular Technologies Limited Immunospot Analyzer.

320 **Intracellular cytokine staining (ICS) assay.** Multiparameter ICS assays were  
321 performed utilizing modification of described previously protocols (24, 25, 33).

322 **Genomic and Subgenomic RNA assay.** SARS-CoV-2 E gene subgenomic RNA  
323 (sgRNA) and N gene genomic RNA (gRNA) were assessed by RT-PCR using primers and  
324 probes as previously described (35, 36). A standard was generated by first synthesizing a gene  
325 fragment of the subgenomic E gene (36). The gene fragment was subsequently cloned into a  
326 pcDNA3.1+ expression plasmid using restriction site cloning (Integrated DNA Technologies).  
327 The insert was in vitro transcribed to RNA using the AmpliCap-Max T7 High Yield Message  
328 Maker Kit (CellScript). Log dilutions of the standard were prepared for RT-PCR assays ranging  
329 from 1x10<sup>10</sup> copies to 1x10<sup>-1</sup> copies. Viral loads were quantified from bronchoalveolar lavage  
330 (BAL) fluid, nasal swabs (NS), rectal swabs (RS) and stool. RNA extraction was performed on a  
331 QIAcube HT using the IndiSpin QIAcube HT Pathogen Kit according to manufacturer's  
332 specifications (Qiagen). The standard dilutions and extracted RNA samples were reverse  
333 transcribed using SuperScript VILO Master Mix (Invitrogen) following the cycling conditions  
334 described by the manufacturer, 25°C for 10 Minutes, 42°C for 1 Hour then 85°C for 5 Minutes. A  
335 Taqman custom gene expression assay (Thermo Fisher Scientific) was designed using the  
336 sequences targeting the E gene sgRNA (36). The sequences for the custom assay were as follows,  
337 sgLeadCoV2.Fwd: CGATCTCTTG TAGATCTGTTCTC, E\_Sarbeco\_R:  
338 ATATTGCAGCAGTACGCACACA, E\_Sarbeco\_P1 (probe): VIC-  
339 AACTAGCCATCCTTACTGCGCTTCG-MGBNFQ. SARS-CoV-2 genomic RNA (gRNA)  
340 was targeted using N gene primers and probe, 2019-nCoV\_N1-F:

341 GACCCCAAATCAGCGAAAT, 2019-nCoV\_N1-R: TCTGGTTACTGCCAGTTGAATCTG,  
342 and 2019-nCoV\_N1-P: FAM-ACCCCGCATTACGTTTGGTGGACC-BHQ1. Reactions were  
343 carried out in duplicate for samples and standards on the QuantStudio 6 and 7 Flex Real-Time  
344 PCR Systems (Applied Biosystems) with the thermal cycling conditions, initial denaturation at  
345 95°C for 20 seconds, then 45 cycles of 95°C for 1 second and 60°C for 20 seconds. Standard  
346 curves were used to calculate genomic and subgenomic RNA copies per ml or per swab; the  
347 quantitative assay sensitivity was 50 copies per ml or per swab for both genomic and  
348 subgenomic assays. Sensitivity of the stool analysis was determined as 200 copies/ gram of stool.

349 **Histopathology.** Necropsies were performed according to IACUC approved protocols at  
350 14 days post infection. Lungs were perfused with 10% neutral-buffered formalin. Three tissue  
351 sections each from the right and left lung lobes were used to evaluate the lung pathology.  
352 Sections were processed routinely into paraffin wax, then sectioned at 5 µm, and resulting slides  
353 were stained with hematoxylin and eosin. All tissue slides were evaluated by a board-certified  
354 veterinary anatomic pathologist blinded to study group allocations.

355 **Statistical analyses.** Comparisons of virologic and immunologic data was performed  
356 using GraphPad Prism 8.4.2 (GraphPad Software). Comparison of data between groups was  
357 performed using two-sided Wilcoxon rank-sum tests. Correlation analyses were performed  
358 either using two-sided Spearman rank-correlation tests or linear regression. P-values of less than  
359 0.05 were considered significant.

360

361 **References**

362

- 363 1. L. Corey, J. R. Mascola, A. S. Fauci, F. S. Collins, A strategic approach to COVID-19 vaccine R&D.  
364 *Science* **368**, 948-950 (2020).
- 365 2. G. Dagotto, J. Yu, D. H. Barouch, Approaches and Challenges in SARS-CoV-2 Vaccine  
366 Development. *Cell host & microbe* **28**, 364-370 (2020).
- 367 3. A. M. Mowat, W. W. Agace, Regional specialization within the intestinal immune system. *Nature*  
368 *Reviews Immunology* **14**, 667-685 (2014).
- 369 4. J. Holmgren, C. Czerkinsky, Mucosal immunity and vaccines. *Nature medicine* **11**, S45-53 (2005).
- 370 5. M. Robert-Guroff, Replicating and non-replicating viral vectors for vaccine development. *Current*  
371 *opinion in biotechnology* **18**, 546-556 (2007).
- 372 6. M. R. Neutra, P. A. Kozlowski, Mucosal vaccines: the promise and the challenge. *Nature reviews.*  
373 *Immunology* **6**, 148-158 (2006).
- 374 7. J. E. Vela Ramirez, L. A. Sharpe, N. A. Peppas, Current state and challenges in developing oral  
375 vaccines. *Advanced drug delivery reviews* **114**, 116-131 (2017).
- 376 8. C. Deal, A. Pekosz, G. Ketner, Prospects for oral replicating adenovirus-vectored vaccines.  
377 *Vaccine* **31**, 3236-3243 (2013).
- 378 9. F. H. Top, Jr. *et al.*, Immunization with Live Types 7 and 4 Adenovirus Vaccines. I. Safety,  
379 Infectivity, Antigenicity, and Potency of Adenovirus Type 7 Vaccine in Humans. *The Journal of*  
380 *Infectious Diseases* **124**, 148-154 (1971).
- 381 10. F. H. TOP, JR, B. A. DUDDING, P. K. RUSSELL, E. L. BUESCHER, CONTROL OF RESPIRATORY  
382 DISEASE IN RECRUITS WITH TYPES 4 AND 7 ADENOVIRUS VACCINES. *American Journal of*  
383 *Epidemiology* **94**, 142-146 (1971).
- 384 11. R. A. Kuschner *et al.*, A phase 3, randomized, double-blind, placebo-controlled study of the  
385 safety and efficacy of the live, oral adenovirus type 4 and type 7 vaccine, in U.S. military recruits.  
386 *Vaccine* **31**, 2963-2971 (2013).
- 387 12. A. Lyons *et al.*, A double-blind, placebo-controlled study of the safety and immunogenicity of live,  
388 oral type 4 and type 7 adenovirus vaccines in adults. *Vaccine* **26**, 2890-2898 (2008).
- 389 13. A. Choudhry, J. Mathena, J. D. Albano, M. Yacovone, L. Collins, Safety evaluation of adenovirus  
390 type 4 and type 7 vaccine live, oral in military recruits. *Vaccine* **34**, 4558-4564 (2016).
- 391 14. C. A. Gaydos, J. C. Gaydos, Adenovirus Vaccines in the U.S. Military. *Military Medicine* **160**, 300-  
392 304 (1995).
- 393 15. M. R. Hilleman, R. A. Stallones, R. L. Gauld, M. S. Warfield, S. A. Anderson, Vaccination Against  
394 Acute Respiratory Illness of Adenovirus (RI-APC-ARD) Etiology. *American Journal of Public Health*  
395 *and the Nations Health* **47**, 841-847 (1957).
- 396 16. N. D. Collins *et al.*, Live Oral Adenovirus Type 4 and Type 7 Vaccine Induces Durable Antibody  
397 Response. *Vaccines* **8**, (2020).
- 398 17. A. S. Bandyopadhyay, J. Garon, K. Seib, W. A. Orenstein, Polio vaccination: past, present and  
399 future. *Future microbiology* **10**, 791-808 (2015).
- 400 18. S. Jain *et al.*, Polio eradication-lessons from the past and future perspective. *Journal of clinical*  
401 *and diagnostic research : JCDR* **8**, ZC56-60 (2014).
- 402 19. C. D. Kirkwood, L. F. Ma, M. E. Carey, A. D. Steele, The rotavirus vaccine development pipeline.  
403 *Vaccine* **37**, 7328-7335 (2019).
- 404 20. R. I. Glass *et al.*, Rotavirus vaccines: current prospects and future challenges. *Lancet* **368**, 323-  
405 332 (2006).

- 406 21. I. Hamming *et al.*, Tissue distribution of ACE2 protein, the functional receptor for SARS  
407 coronavirus. A first step in understanding SARS pathogenesis. *The Journal of Pathology* **203**, 631-  
408 637 (2004).
- 409 22. G. Dagotto *et al.*, Comparison of Subgenomic and Total RNA in SARS-CoV-2-Challenged Rhesus  
410 Macaques. *Journal of Virology* **95**, e02370-02320 (2021).
- 411 23. R. Wolfel *et al.*, Virological assessment of hospitalized patients with COVID-2019. *Nature* **581**,  
412 465-469 (2020).
- 413 24. J. Yu *et al.*, DNA vaccine protection against SARS-CoV-2 in rhesus macaques. *Science* **369**, 806-  
414 811 (2020).
- 415 25. N. B. Mercado *et al.*, Single-shot Ad26 vaccine protects against SARS-CoV-2 in rhesus macaques.  
416 *Nature* **586**, 583-588 (2020).
- 417 26. M. Guo, W. Tao, R. A. Flavell, S. Zhu, Potential intestinal infection and faecal–oral transmission  
418 of SARS-CoV-2. *Nature Reviews Gastroenterology & Hepatology* **18**, 269-283 (2021).
- 419 27. F. Xiao *et al.*, Evidence for Gastrointestinal Infection of SARS-CoV-2. *Gastroenterology* **158**, 1831-  
420 1833.e1833 (2020).
- 421 28. L. Jiao *et al.*, The Gastrointestinal Tract Is an Alternative Route for SARS-CoV-2 Infection in a  
422 Nonhuman Primate Model. *Gastroenterology* **160**, 1647-1661 (2021).
- 423 29. M. M. Lamers *et al.*, SARS-CoV-2 productively infects human gut enterocytes. *Science* **369**, 50  
424 (2020).
- 425 30. R. Zang *et al.*, TMPRSS2 and TMPRSS4 promote SARS-CoV-2 infection of human small intestinal  
426 enterocytes. *Science Immunology* **5**, eabc3582 (2020).
- 427 31. M. Hoffmann *et al.*, SARS-CoV-2 Cell Entry Depends on ACE2 and TMPRSS2 and Is Blocked by a  
428 Clinically Proven Protease Inhibitor. *Cell* **181**, 271-280.e278 (2020).
- 429 32. Y. Song *et al.*, SARS-CoV-2 induced diarrhoea as onset symptom in patient with COVID-19. *Gut*  
430 **69**, 1143 (2020).
- 431 33. A. Chandrashekar *et al.*, SARS-CoV-2 infection protects against rechallenge in rhesus macaques.  
432 *Science* **369**, 812-817 (2020).
- 433 34. J. Yu *et al.*, Deletion of the SARS-CoV-2 Spike Cytoplasmic Tail Increases Infectivity in  
434 Pseudovirus Neutralization Assays. *J Virol*, (2021).
- 435 35. G. Dagotto *et al.*, Comparison of Subgenomic and Total RNA in SARS-CoV-2 Challenged Rhesus  
436 Macaques. *J Virol*, (2021).
- 437 36. R. Wolfel *et al.*, Virological assessment of hospitalized patients with COVID-2019. *Nature*, (2020).

438

**Oral Vaccine (N=9)**

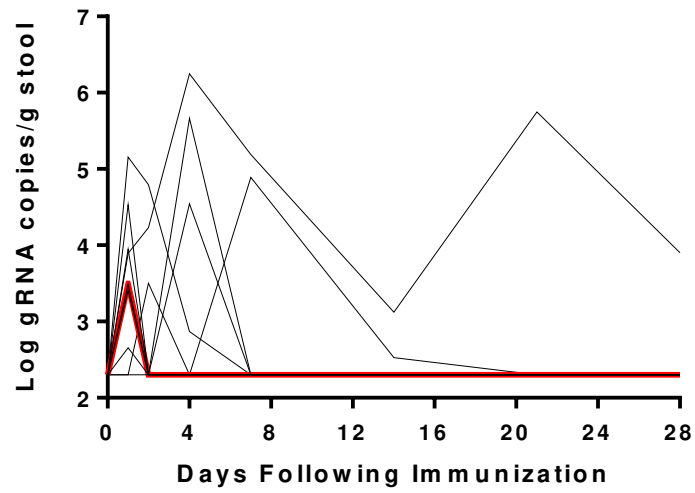

**Sham (N=12)**

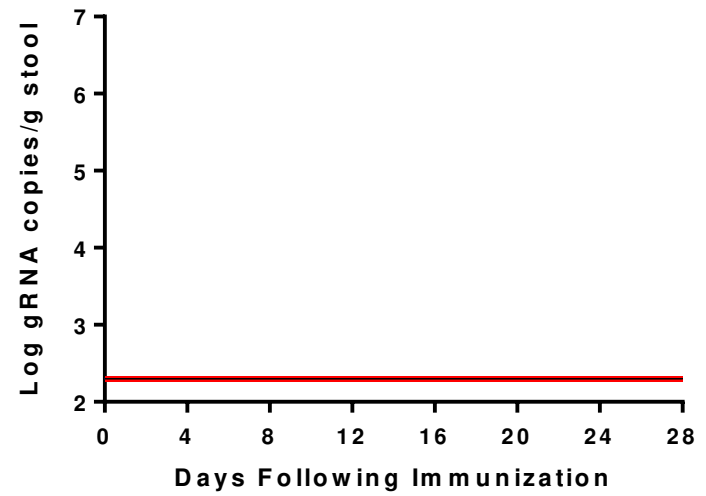

**Figure 1A**

**Oral Vaccine (N=9)**

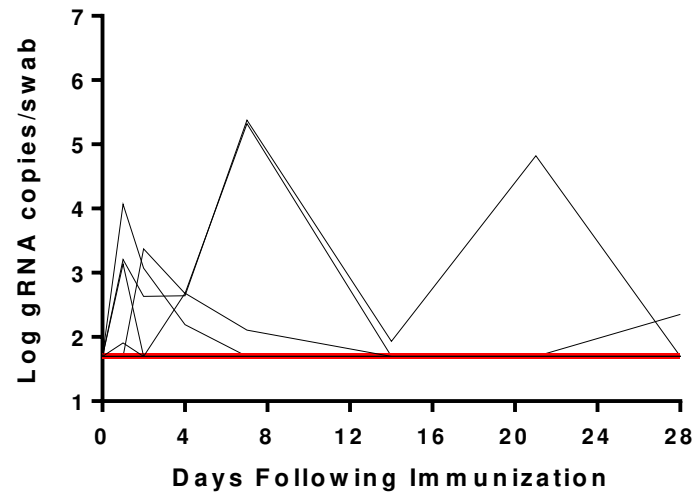

**Sham (N=12)**

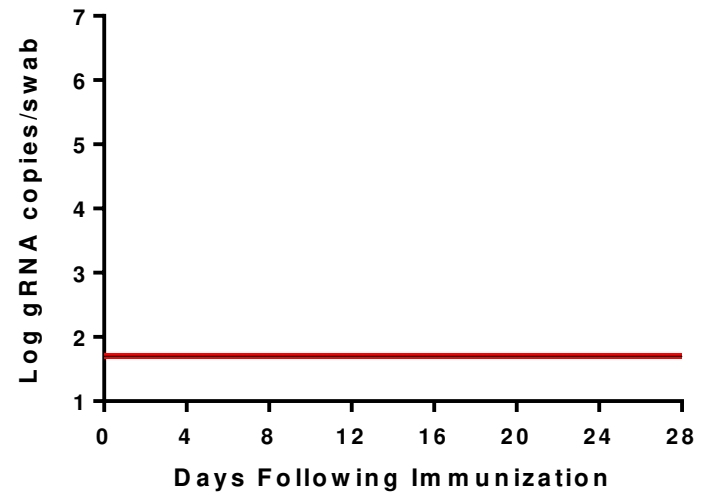

**Figure 1B**

**Oral Vaccine (N=9)**

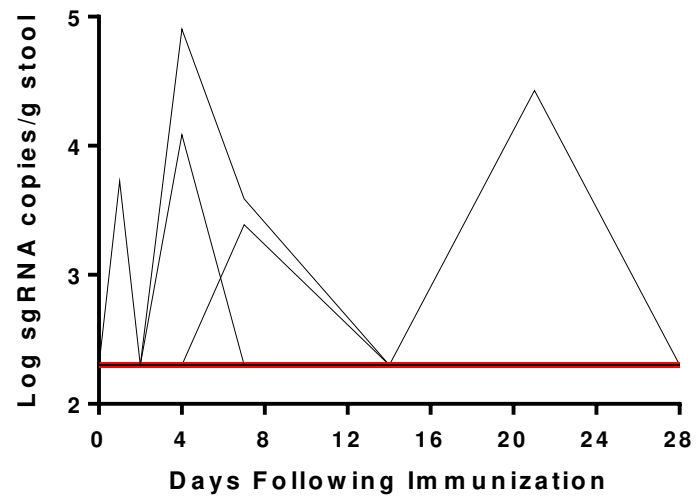

**Sham (N=6)**

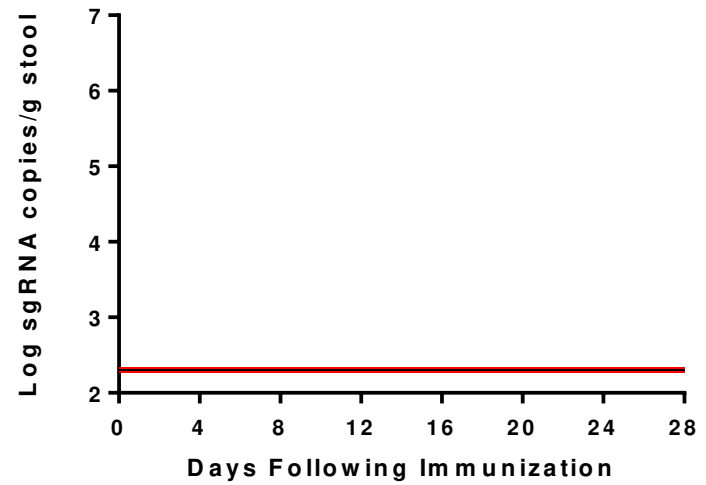

**Figure 1C**

**Oral Vaccine (N=9)**

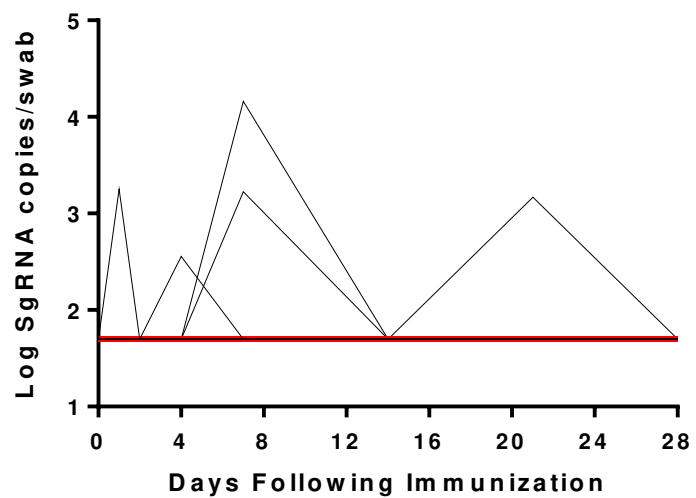

**Sham (N=6)**

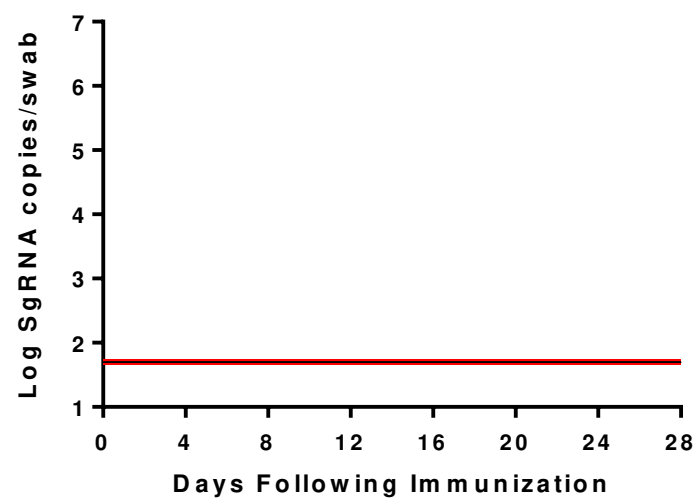

**Figure 1D**



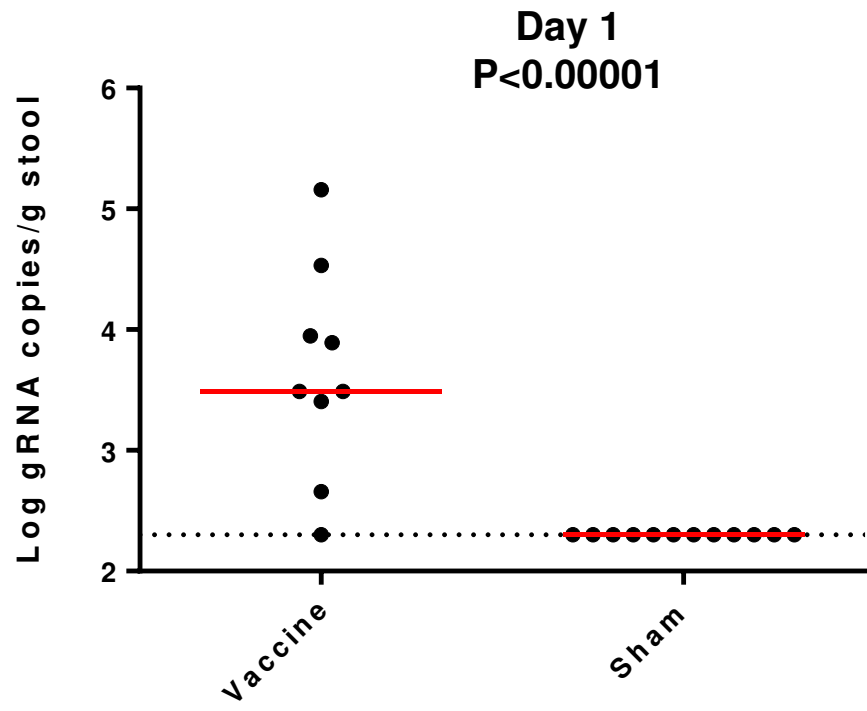

Figure 1E

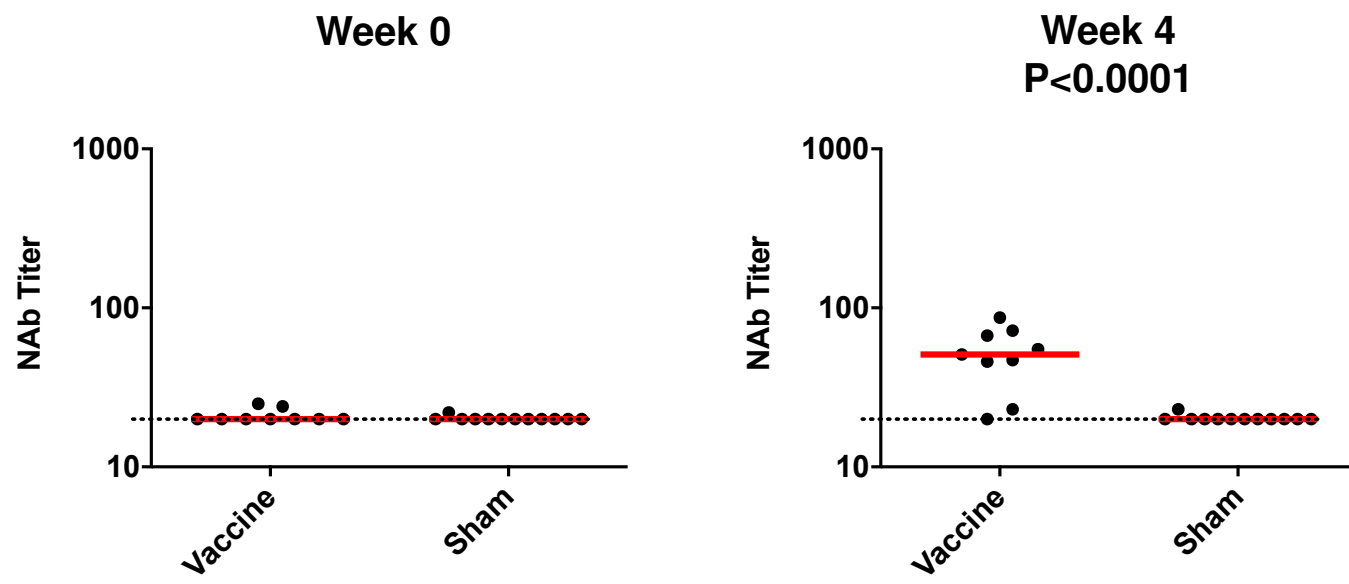

Figure 2

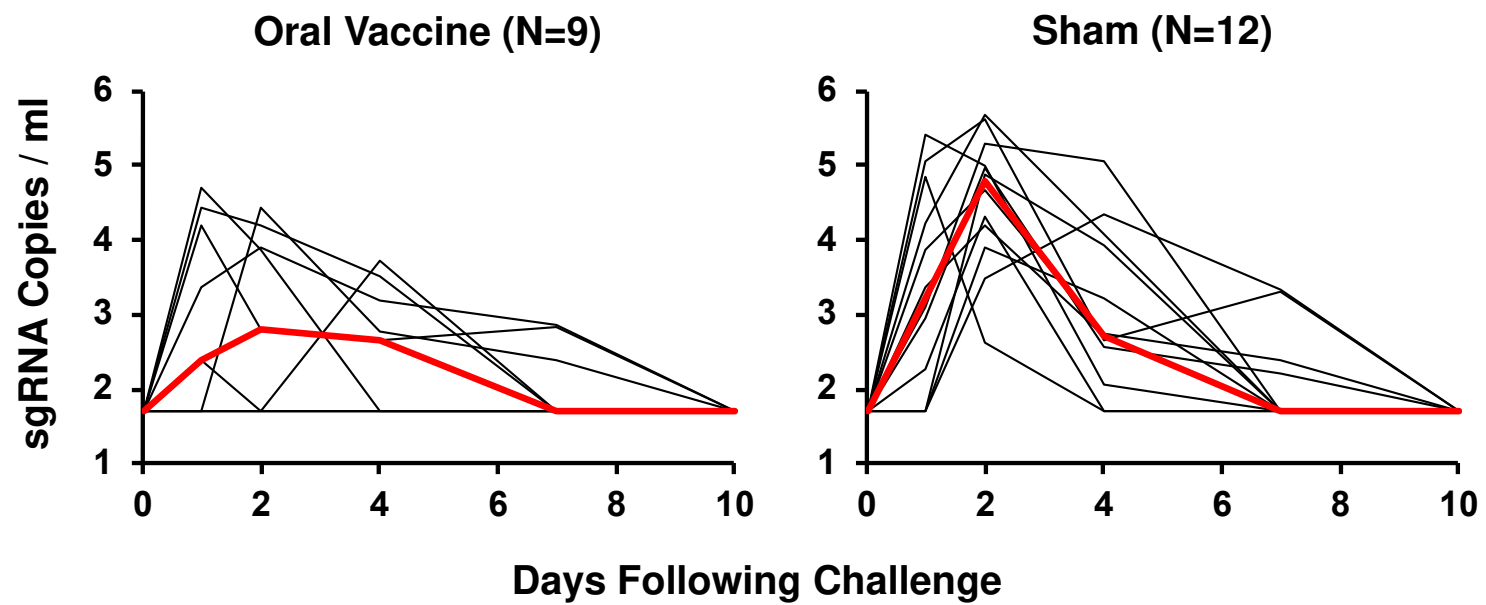

Figure 3A

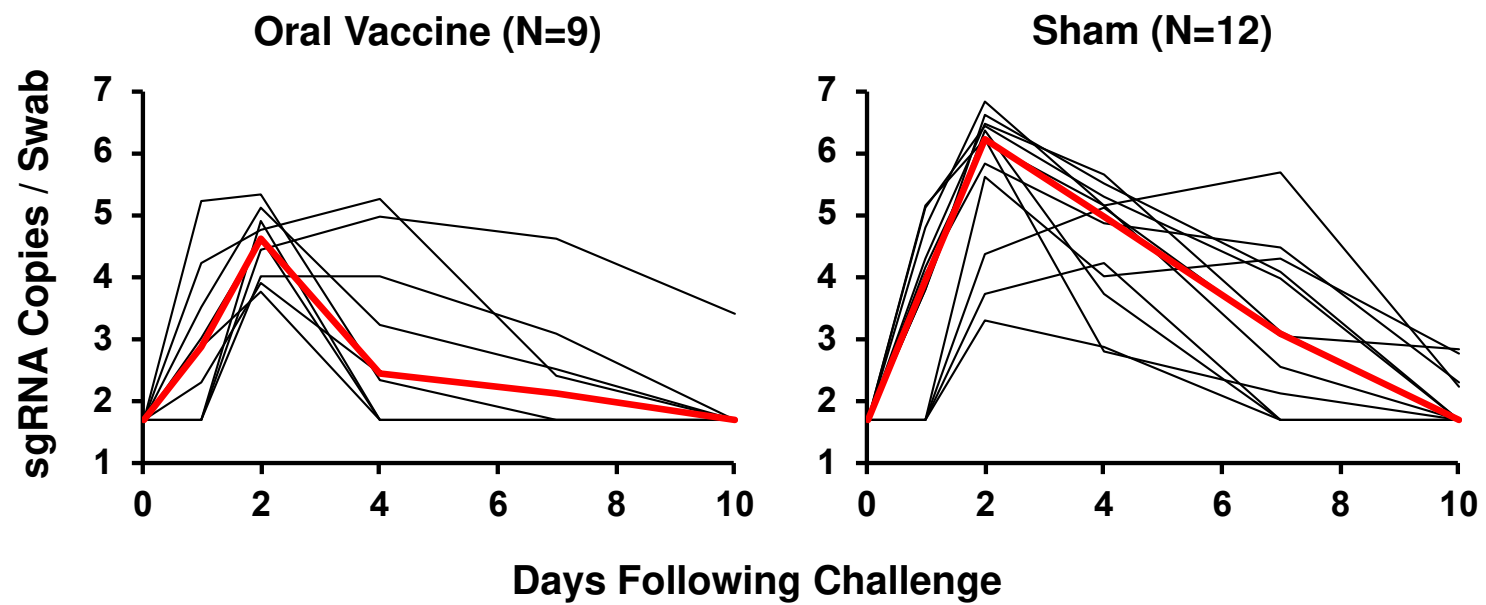

Figure 3B

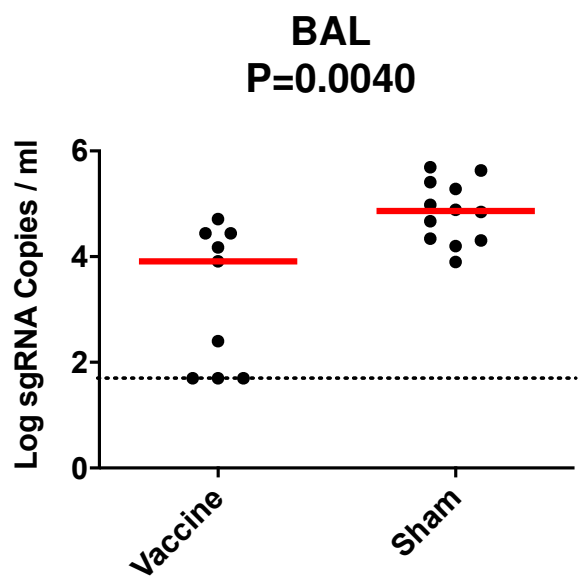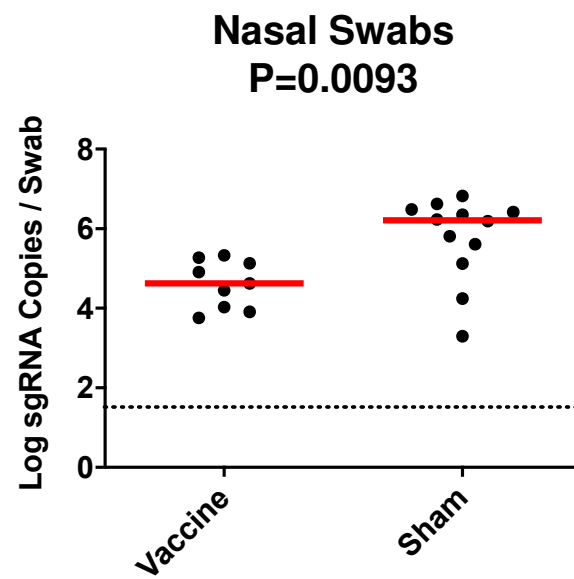

**Figure 3C**

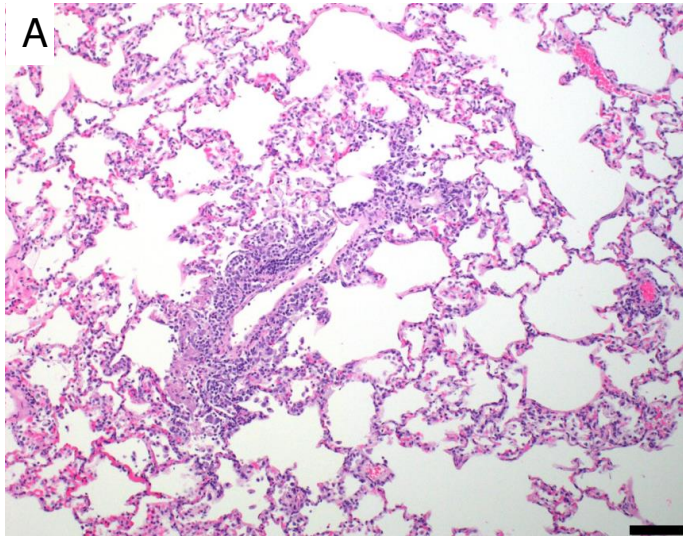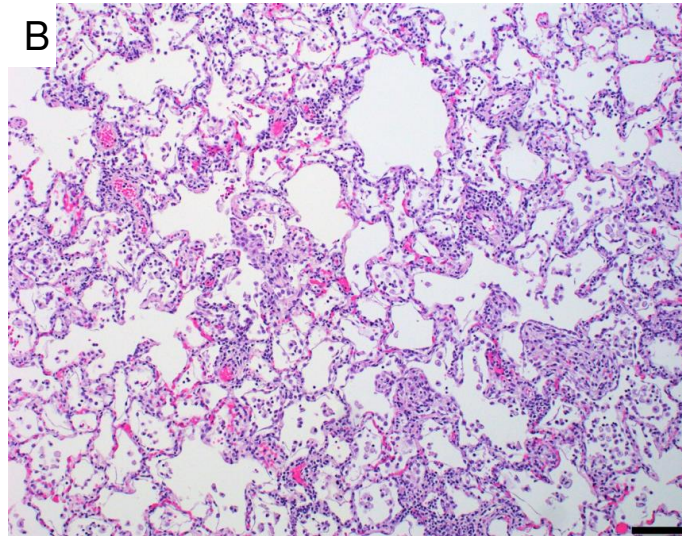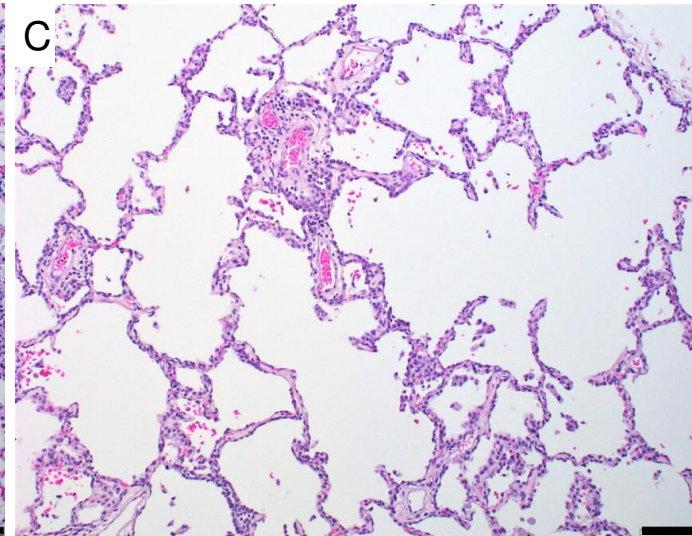

**Figure 4**

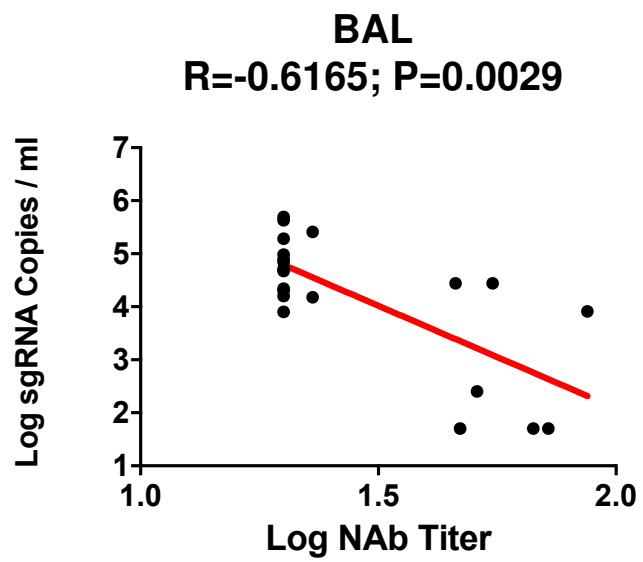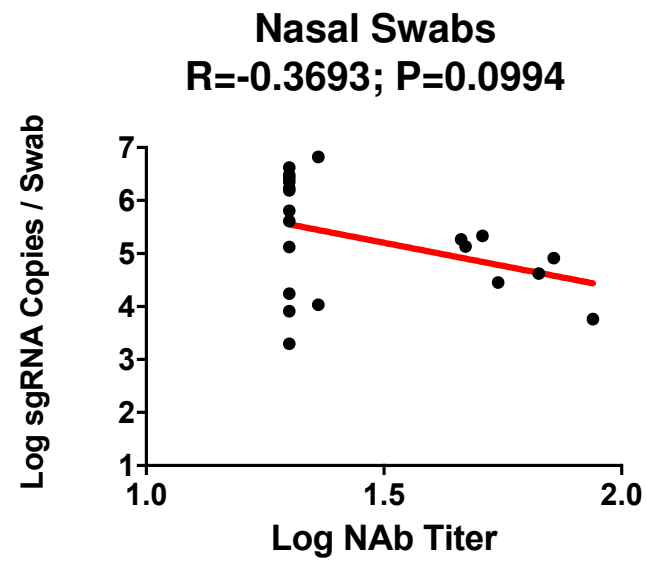

Figure 5A

**BAL**  
R=-0.1442; P=0.6090

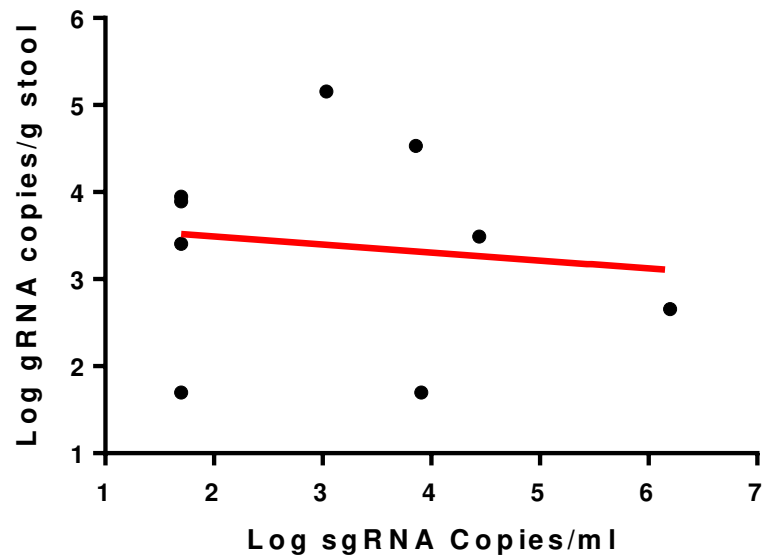

**Nasal Swabs**  
R=-0.1333; P=0.7435

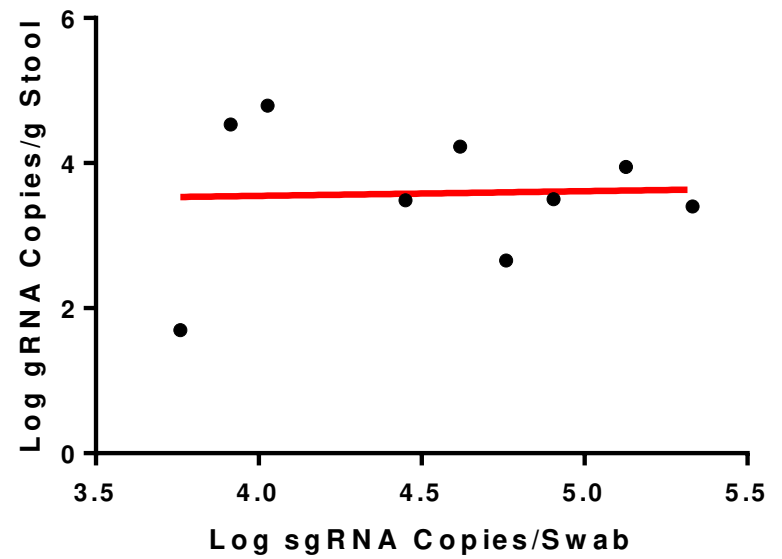

**Figure 5B**
